# Supplementary material for: Expression of TorsinA in a heterologous yeast system reveals interactions with lumenal domains of LINC and nuclear pore complex components
Source: PubMed Central journal article supplement — Mol Biol Cell. 2019 Mar 1;30(5):530–41. doi: 10.1091/mbc.E18-09-0585 (PMC6589686; doi:10.1091/mbc.e18-09-0585), 2019-03-01

# Supplemental Materials

*Molecular Biology of the Cell*

Chalfant et al.

Figure S1: TorA-GFP and TorA- $\Delta$ E-GFP, but not TorA-GD-GFP accumulate at SPBs when produced at low levels.

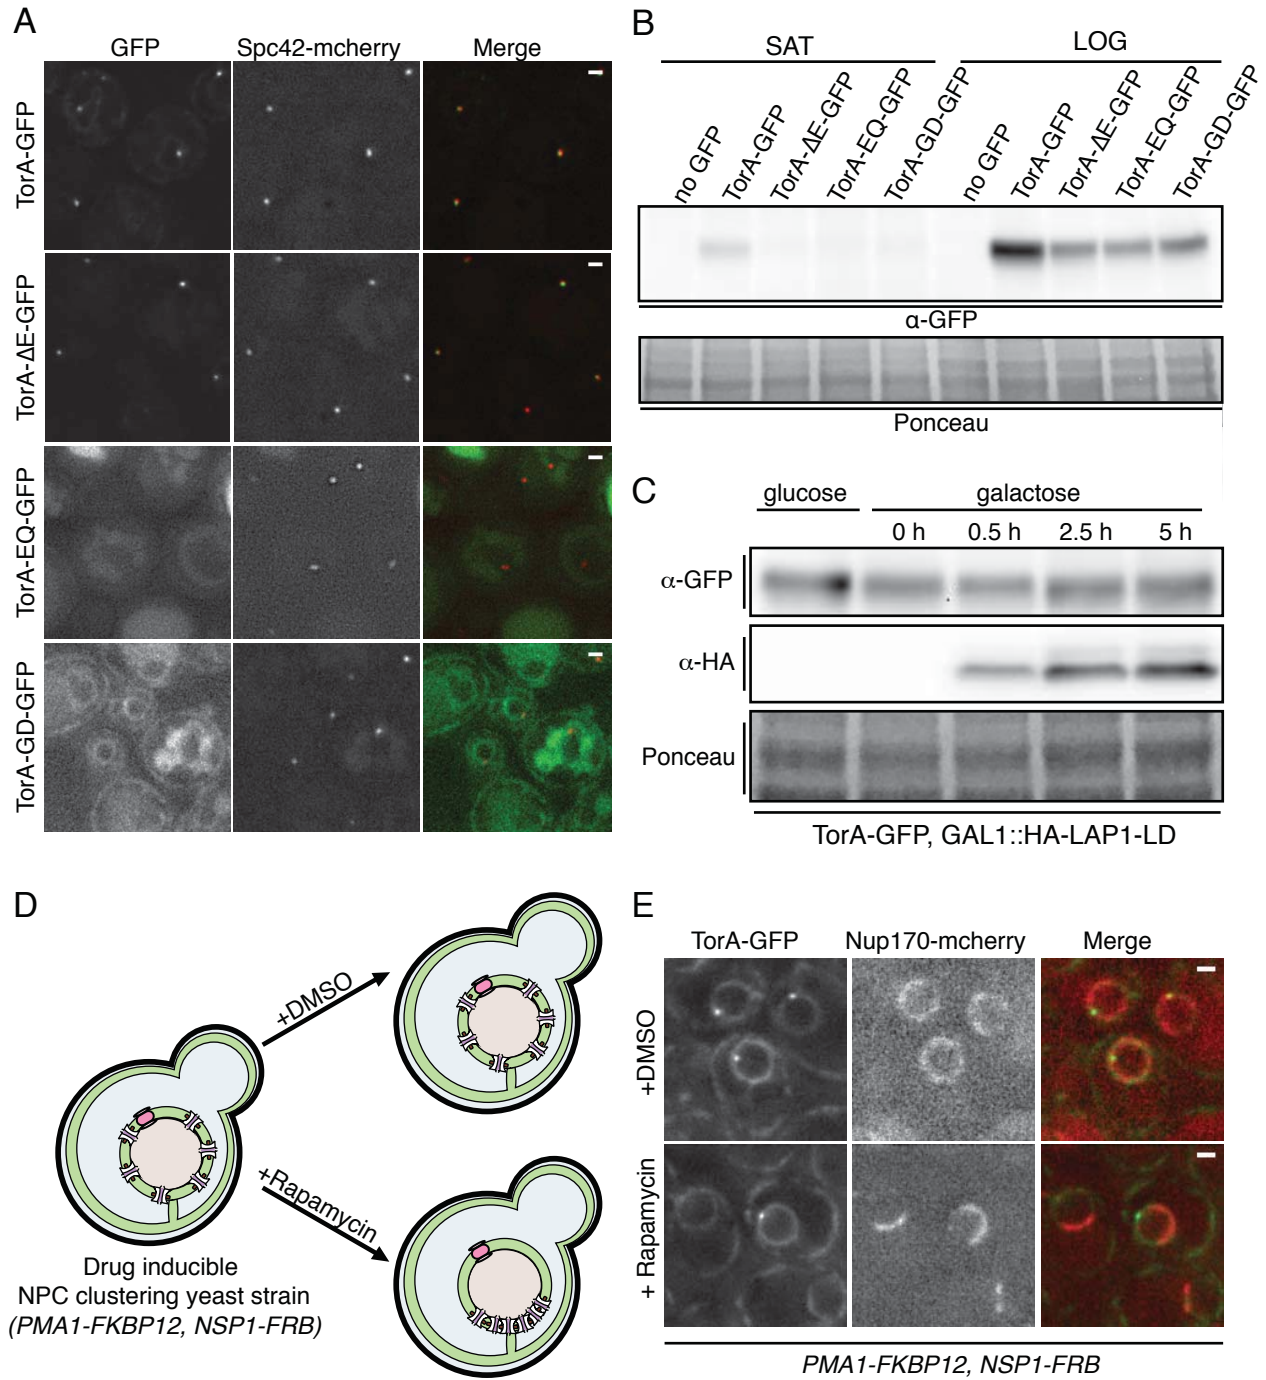

Figure S2: Identification of TorA-specific binding partners and analysis of Mps3 luminal domain.

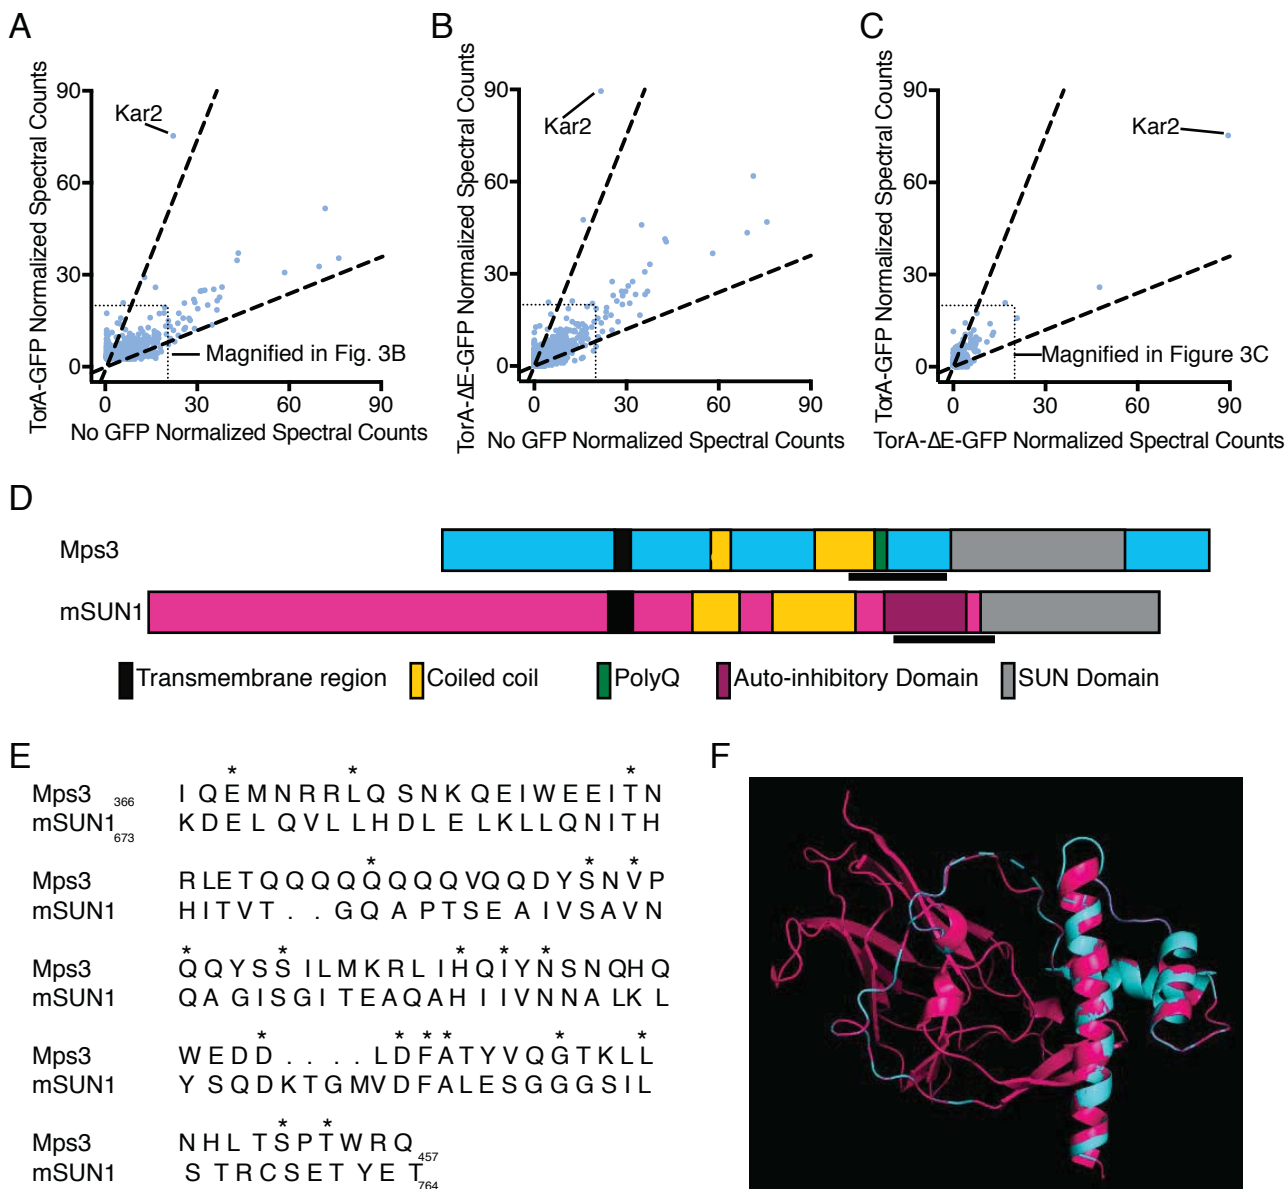

Supplement: mbc-30-530-s001.pdf [file mbc-30-530-s001.pdf]
